# Supplementary material for: Selective demethylation of two CpG sites causes postnatal activation of the Dao gene and consequent removal of d-serine within the mouse cerebellum
Source: PubMed Central journal article supplement (PMC6819446; doi:10.1186/s13148-019-0732-z), 2019-10-28
Supplement: 13148_2019_732_MOESM2_ESM.pdf [file 13148_2019_732_MOESM2_ESM.pdf]

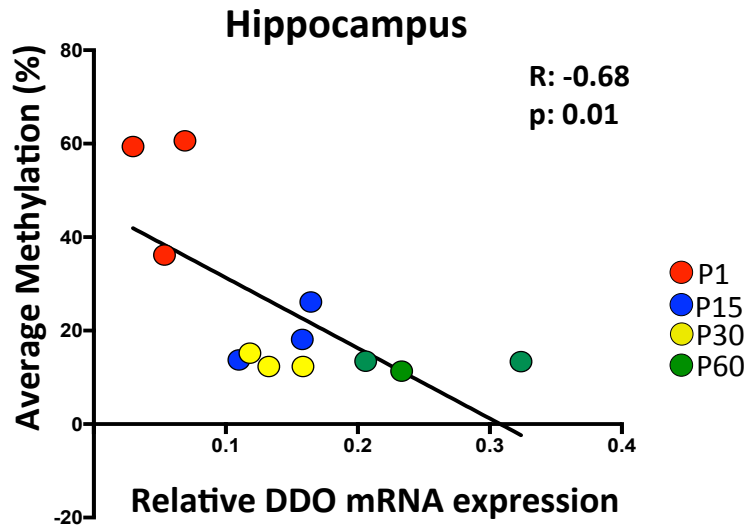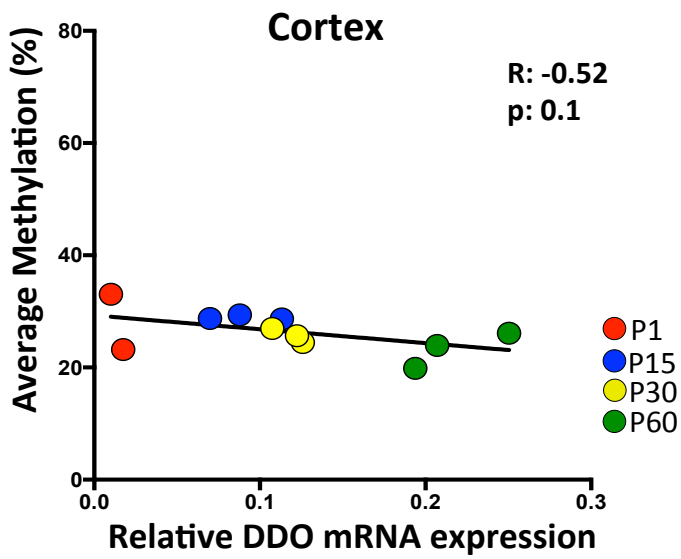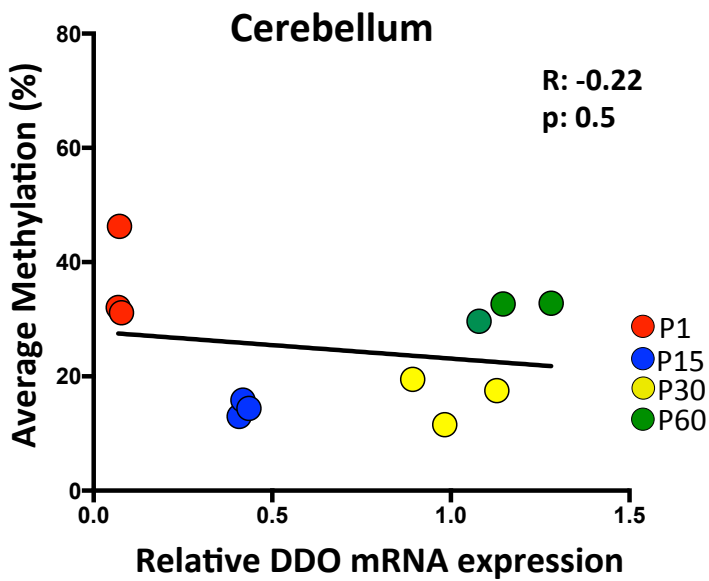

Supplementary Figure S2
